# Supplementary material for: New egg-shaped fullerenes: non-isolated pentagon structures of Tm3N@Cs(51 365)-C84 and Gd3N@Cs(51 365)-C84
Source: Royal Society of Chemistry journal article supplement (doi:10.1039/b716037b), 2008-01-01
Supplement: b716037b.pdf [file b716037b.pdf]

## Supporting Information

### New Egg-Shaped Fullerenes: Non-Isolated Pentagon Structures of $\text{Tm}_3\text{N}@C_{84}$ and $\text{Gd}_3\text{N}@C_{84}$

Tianming Zuo,<sup>c</sup> Marilyn M. Olmstead,<sup>\*a</sup> Frederic Melin,<sup>b</sup> Luis Echegoyen,<sup>\*b</sup> Harry C. Dorn,<sup>\*c</sup>  
Manuel Chaur,<sup>b</sup> Christopher J. Chancellor,<sup>a</sup> Christine M. Beavers<sup>a</sup> and Alan L. Balch<sup>\*a</sup>

**Preparation and Purification of Isomer II of  $\text{Tm}_3\text{N}@C_{84}$ .** A sample of  $\text{Tm}_3\text{N}@C_{84}$  was synthesized in an arc-discharge generator by vaporizing the composite graphite rods recessedly packed with the mixture of  $\text{Tm}_2\text{O}_3$ , graphite powder, and  $\text{Fe}_x\text{N}$  in a weight ratio of 2.09:1.0:0.4, respectively, in a low pressure  $\text{He}/\text{N}_2$  static atmosphere. The raw soot was extracted for 20 hours with toluene in a Soxhlet device. The first stage HPLC of the flash elution after chemical separation using cyclopentadiene-functionalized Merrifield peptide resin (CPDE-MPR) demonstrated seven thulium-containing fractions on 5PBB column similar to those of the terbium-based elution using same method. The fourth fraction contains  $\text{Tm}_3\text{N}@C_{84}$  (isomers I and II),  $\text{Tm}@C_{90}$  (I, II) (See supporting information). The first isomer of  $\text{Tm}_3\text{N}@C_{84}$  is much less abundant than the second isomer, as the situations of our reported  $\text{Tb}_3\text{N}@C_{84}$  (I, II). The structural work reported here was done on the second and more abundant isomer,  $\text{Tm}_3\text{N}@C_{84}(\text{II})$ , isolated in the second HPLC stage using a 5PYE column. The HPLC chromatogram, negative ion LD-TOF MS spectrum, and the UV/Vis absorption spectrum of the pure  $\text{Tm}_3\text{N}@C_{84}(\text{II})$  are shown below.

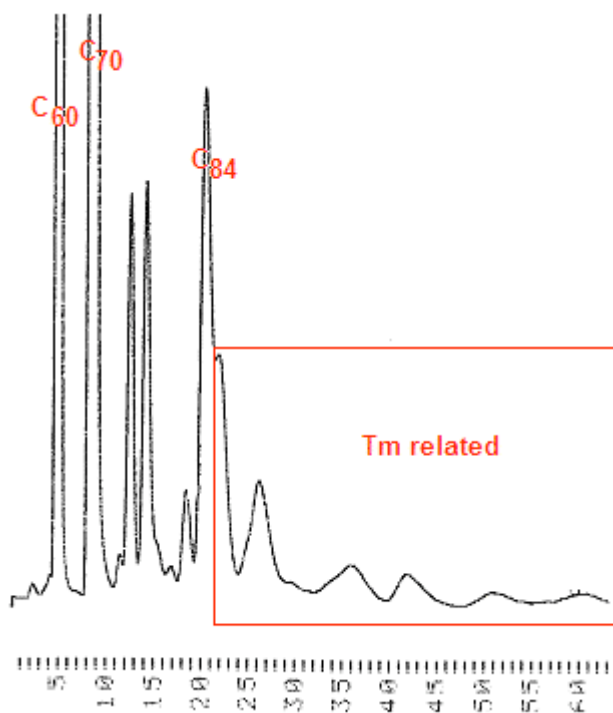

**Figure 1S.** HPLC trace of the extract on 5PBB column (4.6mm x 250mm). Mobile phase: toluene; Flow rate: 2.0 mL/minute; Detection wavelength: 390nm.

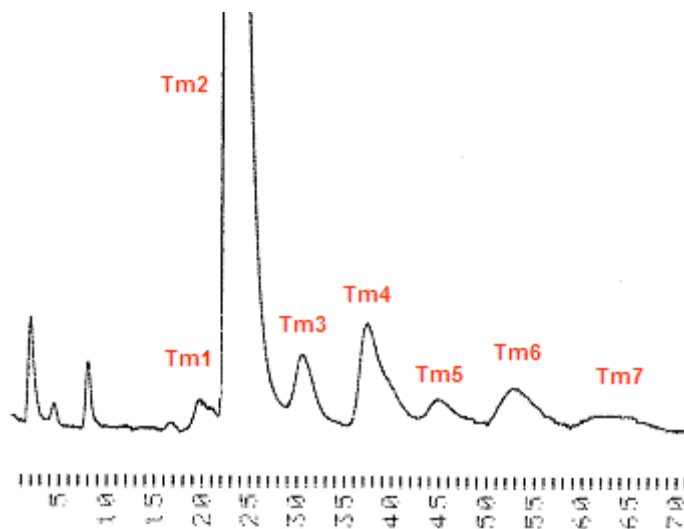

**Figure 2S.** The first stage HPLC of the flash elution after chemical separation using cyclopentadiene-functionalized Merrifield peptide resin (CPDE-MPR). Column: 5PBB(4.6 mm x 250 mm); Mobile phase: toluene; Flow rate: 2.0 mL/minute; Detection wavelength: 390nm.

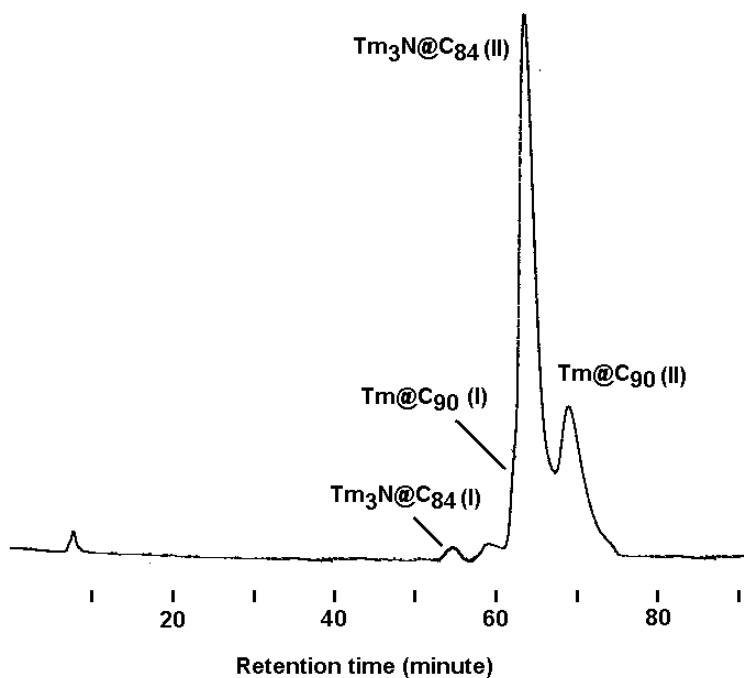

**Figure 3S.** The second stage HPLC separation for the fraction 4. Column: 5PYE(10 mm x 250 mm); Mobile phase: toluene; Flow rate: 2.0 mL/minute; Detection wavelength: 390 nm.

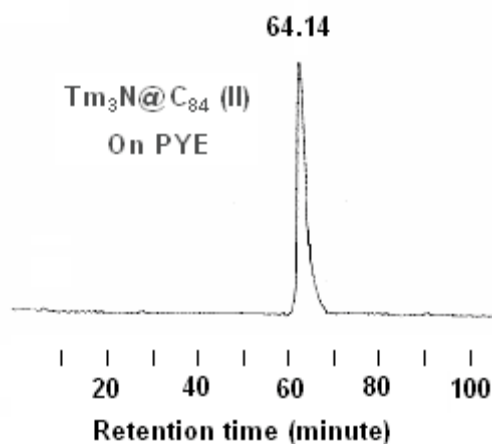

**Figure 4S.** HPLC of the pure isomer II of  $Tm_3N@C_{84}(II)$ . Column: 5PYE(10 mm x 250 mm); Mobile phase: toluene; Flow rate: 2.0 mL/minute; Detection wavelength: 390 nm.

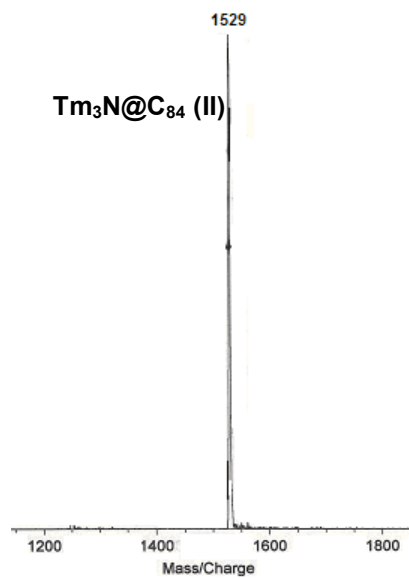

**Figure 5S.** Negative mode LD-TOF MS spectrum of the pure Tm<sub>3</sub>N@C<sub>84</sub>(II).

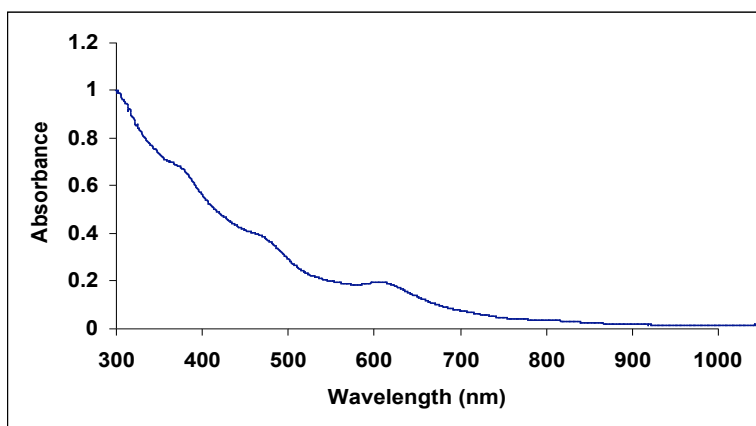

**Figure 6S.** UV-vis of the pure Tm<sub>3</sub>N@C<sub>84</sub>(II) in toluene.

**Preparation and Purification of Isomer II of  $Gd_3N@C_{84}$ .** The sample of  $Gd_3N@C_{84}$  was synthesized in an arc-discharge reactor by vaporizing graphite rods containing mixture of  $Gd_2O_3$  and graphite powder in a  $\sim 400$  Torr He/ $N_2$  atmosphere. The raw soot was extracted for  $\sim 20$  hours with xylene in a custom-built automated extractor/condenser. The extract was treated with cyclopentadiene to remove the empty-cage fullerenes and the higher order species were separated from the  $Gd_3N@C_{80}$  via HPLC. The  $Gd_3N@C_{84}$  metallofullerene was isolated with purity higher than 95 % by high performance liquid chromatography (HPLC) using a semipreparative 10x250 mm Buckyrep-M column. The composition was established by mass spectroscopy.

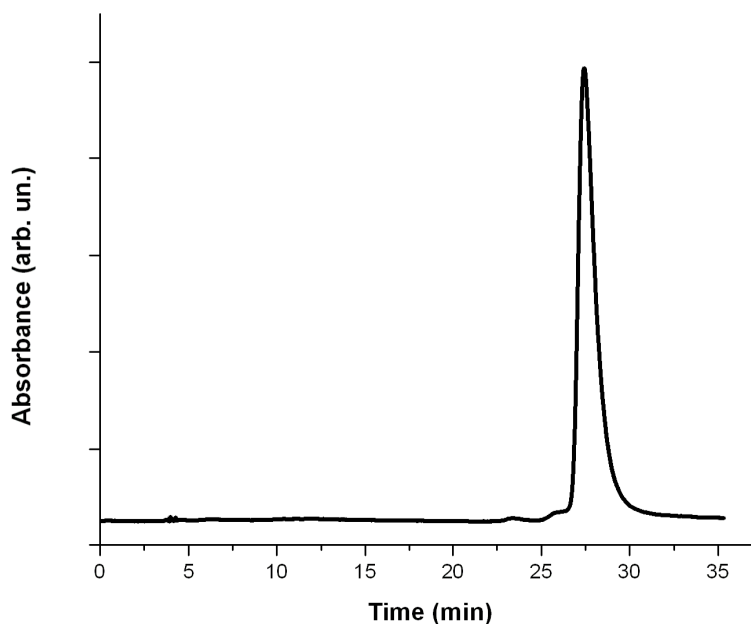

**Figure 7S.** HPLC of the pure  $Gd_3N@C_{84}$  (I). Column: semipreparative 10 x 250 mm Buckyrep-M; Mobile phase: toluene; Flow rate: 4.0 mL/minute; Detection wavelength: 372 nm.

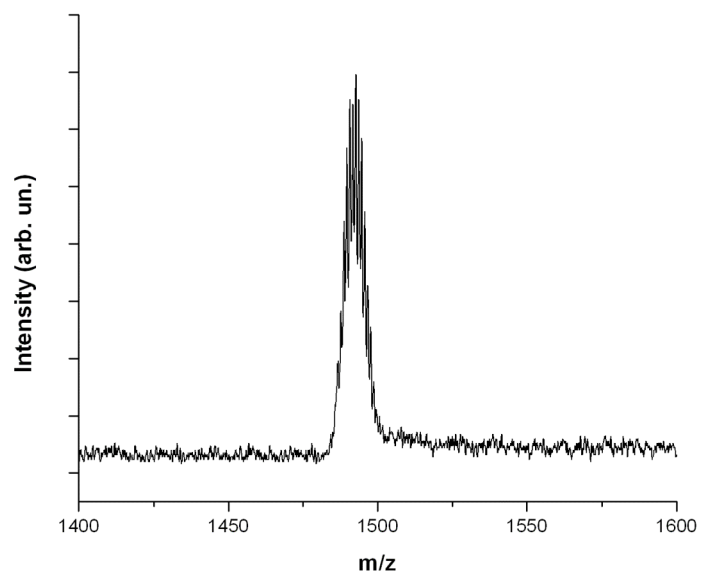

**Figure 8S.** MALDI-TOF MS spectrum of the pure  $\text{Gd}_3\text{N}@C_{84}(\text{II})$ .
